# Supplementary material for: Preparation of heterostructured TiO2/MoS2 for efficient photocatalytic rhodamine B degradation
Source: Royal Society of Chemistry journal article supplement (doi:10.1039/d1ma01050f), 2022-01-01
Supplement: d1ma01050f1.pdf [file d1ma01050f1.pdf]

## Supporting Information

### **Preparation of Heterostructured TiO<sub>2</sub>/MoS<sub>2</sub> for Efficient Photocatalytic Rhodamine B Degradation**

Ping Li<sup>a†</sup>, Mengyou Gao<sup>a,b†</sup>, Lei Sun<sup>a</sup>, Huizhong Xu<sup>a</sup>, Xiaochen Dong<sup>c</sup>, Jianjian Lin<sup>\*a</sup>

*<sup>a</sup> Shandong Key Laboratory of Eco-chemical Engineering, College of Chemistry and Molecular Engineering, Qingdao University of Science and Technology, Qingdao 266042, PR China. Email: Jianjian\_Lin@qust.edu.cn*

*<sup>b</sup> College of Automation and Electronic Engineering, Qingdao University of Science and Technology, Qingdao 266042, PR China.*

*<sup>c</sup> Key Laboratory of Flexible Electronics (KLOFE) & Institute of Advanced Materials (IAM), Nanjing Tech University (NanjingTech), 30 South Puzhu Road, Nanjing, 211800, PR China.*

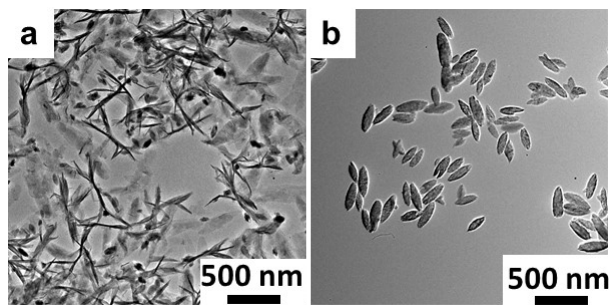

**Figure S1.** SEM images at the reaction time for (a) 2 h and (b) 12 h.

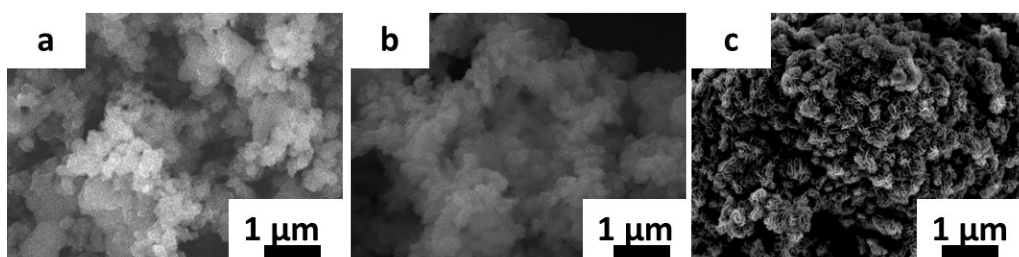

**Figure S2.** SEM images of as-prepared H-TiO<sub>2</sub>/MoS<sub>2</sub> at stage of (a) 4 h, (b) 12 h and (c) 24 h.

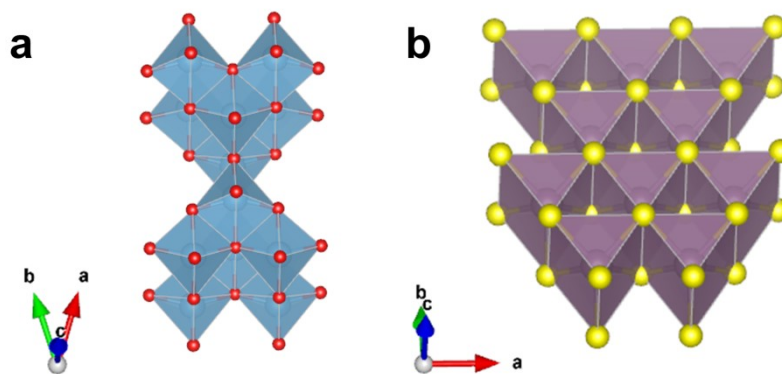

**Figure S3.** The crystal structures of (a) TiO<sub>2</sub> (anatase) and (b) MoS<sub>2</sub> (2H).

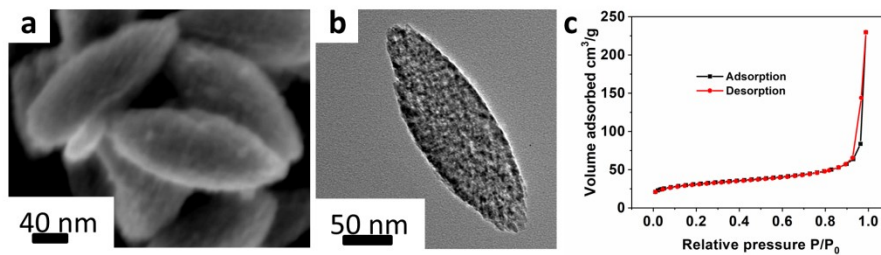

**Figure S4.** (a) SEM and (b) TEM images, and (c) N<sub>2</sub> adsorption and desorption curves of porous TiO<sub>2</sub>.

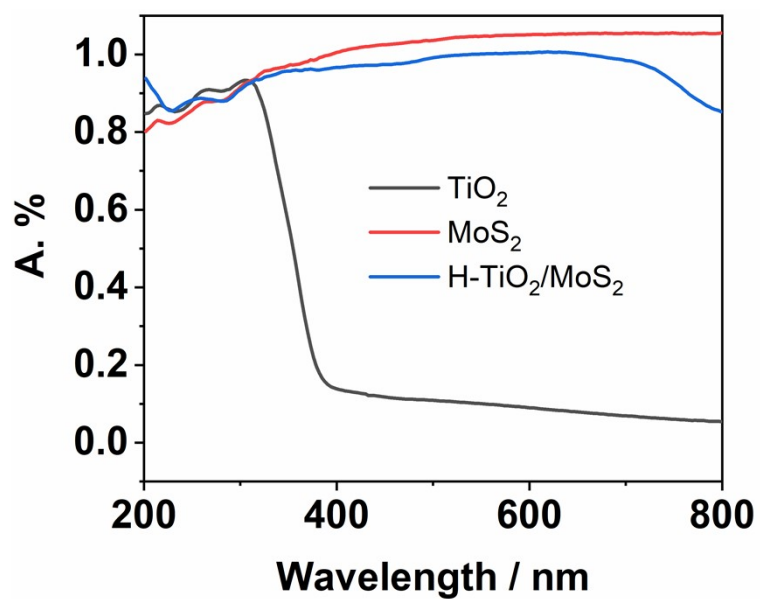

**Figure S5** UV-visible absorption spectra of TiO<sub>2</sub>, H-TiO<sub>2</sub>/MoS<sub>2</sub> and pure MoS<sub>2</sub>.

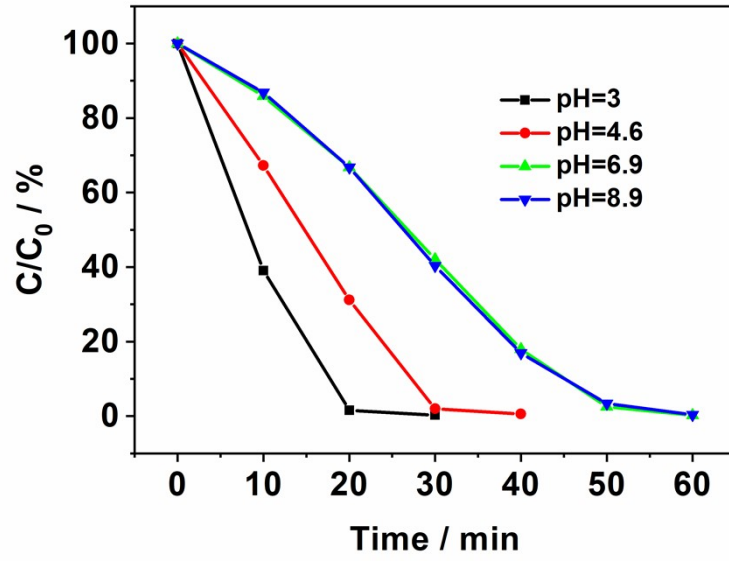

**Figure S6.** The photodegradation effects of H-TiO<sub>2</sub>/MoS<sub>2</sub> for RhB under various pH condition.

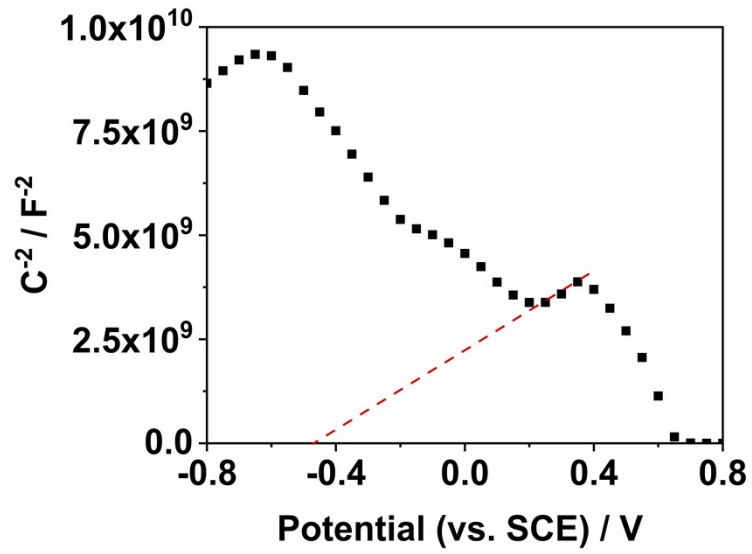

**Figure S7.** Mott-Schottky curves of H-TiO<sub>2</sub>/MoS<sub>2</sub>.

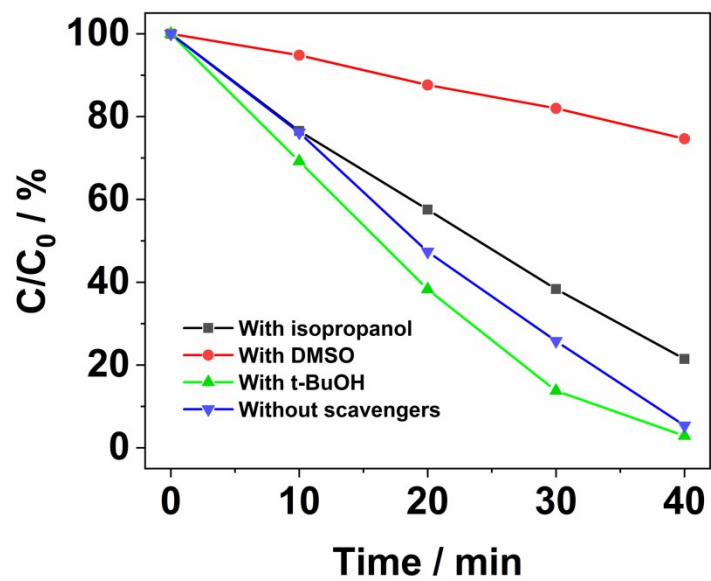

**Figure S8.** The photodegradation effects of H-TiO<sub>2</sub>/MoS<sub>2</sub> for RhB with isopropanol, DMSO and t-BuOH added and without scavengers added.
